# Supplementary material for: Preparation of synthetic glycoconjugates as potential vaccines against Shigella flexneri serotype 2a disease
Source: Royal Society of Chemistry journal article supplement (doi:10.1039/b400986j), 2004-01-01
Supplement: b400986j.doc [file b400986j.doc]

**Supplementary Material**

**Maleimido activated PADRE Lys (8).**

Starting from 0.1 mmol of Fmoc Pal Peg Ps resin, amino acids (0.4 mmol) were incorporated using HATU/DIEA (0.4 mmol) activation. The *N*-terminal D-Ala was incorporated as Boc-D-Ala-OH. After completion of the chain elongation, the resin was treated three times with hydrazine monohydrate (2% solution in DMF, 25 mL/g of peptide resin) for 3 min, which allowed the selective deblocking of the ivDde protecting group. To a solution of maleimide butyric acid (183 mg, 1.0 mmol) in CH2Cl2 (2 mL) was added DCC (103 mg, 0.5 mmol). After stirring for 10 min, the suspension was filtered, and the filtrate was added to the drained peptide resin. DIEA (17µL, 0.5 mmol) was added. After 30 min, the peptide resin was washed with DMF (100 mL), MeOH (100 mL), and dried under vacuum. After TFA/TIS/H2O (95/2.5/2.5) cleavage (10 mL/g of resin, 1.5 h), the crude peptide (157 mg) was dissolved in 16 mL of 15% CH3CN in 0.08% aq TFA, and purified by reverse phase Medium Pressure Liquid Chromatography (MPLC) on a Nucleoprep 20 µm C18 100 Å column, using a 15-75% linear gradient of CH3CN in 0.08% aq TFA over 60 min at 25 mL/min flow rate (214 nm detection) to give **8** (107 mg, 61%). Analytical RP-HPLC (230 nm): Rt 13.4 min (94% pure, Nucleosil 5 µm C18 300 Å analytical column, using a 15-45% linear gradient over 20 min of CH3CN in 0.08% aq TFA at 1 mL/min flow rate). ES-MS Calcd for C85H139N21O19: 1759.18. Found: 1758.83.

**2-Azidoethyl (2,3,4,6-Tetra-*O*-benzyl--D-glucopyranosyl)-(14)-(2,3-di-*O*-benzoyl--L-rhamnopyranosyl)-(13)-2-acetamido-2-deoxy-4,6-*O*-isopropylidene--D-glucopyranoside (15) and 2-Azidoethyl (2,3,4,6-Tetra-*O*-benzyl--D-glucopyranosyl)-(14)-(2,3-di-*O*-benzoyl--L-rhamnopyranosyl)-(13)-2-acetamido-2-deoxy--D-glucopyranoside (16).** (a) The disaccharide donor **4**[44] (1.425 g, 1.37 mmol) and the acceptor **7** (377 mg, 1.14 mmol) with 4Å-MS (2 g) were placed under argon and CH2Cl2 (15 mL) was added. The mixture was stirred for 1 h at rt, then cooled to –40 °C. A solution of BF3.OEt2 (0.5 mL, 4.11 mmol) in CH2Cl2 (5 mL) was added dropwise. The mixture was stirred at –40 °C to –15 °C over 3 h. Et3N (2.5 mL) was added and the mixture stirred for 20 min. The mixture was filtered through a pad of Celite, and the filtrate was concentrated. The residue was purified by column chromatography (solvent B, 2:3) to give **15** (803 mg, 58%) as a colourless foam. Further elution (solvent A, 9:1) gave **16** (395 mg, 30%) as a colourless foam; Compound **16** had []D +91.5 (*c* 0.18); 1H NMR:  6.99-8.02 (m, 30H, Ph), 6.10 (d, 1H, *J*NH,2 = 6.9 Hz, NH), 5.60 (dd, 1H, *J*2,3 = 3.4, *J*3,4 = 9.1 Hz, H-3C), 5.52 (dd, 1H, H-2C), 5.20 (d, 1H, *J*1,2 = 8.3 Hz, H-1D), 5.00 (d, 1H, *J*1,2 = 1.9 Hz, H-1C), 4.95 (d, 1H, *J*1,2 = 3.4 Hz, H-1E), 4.89-4.63 (m, 5H, CH2Ph), 4.47 (dd, 1H, *J*2,3 = 8.3, *J*3,4 = 10.3 Hz, H-3D), 4.25 (d, 1H, *J* = 10.9 Hz, CH2Ph), 4.19 (m, 2H, H-5C, CH2Ph), 4.06 (m, 1H, CH2O), 3.87 (m, 5H, H-3E, 4C, 6aD, 6bD, CH2Ph), 3.74-3.58 (m, 4H, H-4E, 5D, 5E, CH2O), 3.50 (m, 3H, H-2E, 4D, CH2N3), 3.32 (d, 1H, *J*6a,6b = 9.6 Hz, H-6aE), 3.26 (m, 1H, CH2N3), 3.04 (d, 2H, H-2D, 6bE), 2.02 (s, 3H, CH3CO), 1.51 (d, 3H, *J*5,6 = 6.2 Hz, H-6C); 13C NMR:  171.5, 165.6, 165.2 (3C, C=O), 138.6-127.3 (Ph), 99.6 (C-1C), 99.5 (C-1E), 99.0 (C-1D), 83.4 (C-3D), 81.6 (C-3E), 80.1 (C-2E), 79.2 (C-4C), 77.2 (C-4E), 75.5 (CH2Ph), 75.1 (C-4D), 74.7, 74.0, 73.2 (3C, CH2Ph), 71.3 (C-5D*), 70.9 (C-5E*), 70.8 (C-3C), 70.4 (C-2C), 69.0 (C-5C), 68.8 (CH2O), 67.5 (C-6E), 62.6 (C-6D), 57.9 (C-2D), 50.5 (CH2N3), 23.4 (*C*H3CO), 18.2 (C-6C). FAB-MS for C64H70N4O17 (M, 1166) *m/z* 1185 [M+Na]+. Anal. Calcd. for C64H70N4O17.H2O: C, 64.85; H, 6.12; N, 4.73%. Found: C, 64.71; H, 6.01; N, 4.83%.

(b) 4 Å Molecular sieves (560 mg) were added to a solution of donor **4** (565 mg, 0.54 mmol) and acceptor **7** (150 mg, 0.45 mmol) in CH2Cl2 (3 mL), and the suspension was stirred for 15 min at –40 °C. Triflic acid (16 µL) was added and the mixture was stirred for 3 h once the cooling bath had reached rt. Et3N was added and after 15 min, the mixture was filtered through a pad of Celite. Volatiles were evaporated and the residue was column chromatographed (solvent B, 9:1) to give **15** (475 mg, 87%). []D +87.7 (*c* 0.32); 1H NMR:  6.99-8.07 (m, 30H, Ph), 6.21 (d, 1H, *J*NH,2 = 7.2 Hz, NH), 5.58 (dd, 1H, *J*2,3 = 3.6, *J*3,4 = 10.0 Hz, H-3C), 5.44 (dd, 1H, *J*1,2 = 1.8 Hz, H-2C), 5.13 (d, 1H, *J*1,2 = 8.3 Hz, H-1D), 5.02 (d, 1H, *J*1,2 = 3.4 Hz, H-1E), 4.97 (d, 1H, H-1C), 4.90-4.64 (m, 5H, CH2Ph), 4.45 (pt, 1H, *J*3,4 = *J*4,5 = 9.5 Hz, H-3D), 4.37 (d, 1H, CH2Ph), 4.31 (dq, 1H, *J*5,6 = 6.2, *J*4,5 = 9.3 Hz, H-5C), 4.27 (d, 1H, CH2Ph), 4.04 (m, 1H, CH2O), 3.99-3.88 (m, 4H, H-3E, 4C, 6aD, CH2Ph), 3.82 (pt, 1H, *J*5,6b = *J*6a,6b = 10.4 Hz, H-6bD), 3.76-3.62 (m, 4H, H-4D, 4E, 5E, CH2O), 3.54-3.44 (m, 3H, H-2E, 5D, CH2N3), 3.36 (dd, 1H, *J*5,6a = 1.5 Hz, H-6aE), 3.28 (m, 1H, CH2N3), 3.15 (m, 1H, H-2D), 3.04 (dd, 1H, *J*5,6b = 1.2 Hz, H-6bE), 2.01 (s, 3H, CH3CO), 1.43 (s, 6H, (CH3)2C), 1.36 (d, 3H, H-6C); 13C NMR:  171.7, 165.6, 163.4 (C=O), 138.6-127.3 (Ph), 99.9 (C-1D), 99.7 (C-1E), 98.2 (C-1C), 91.9 (*C*(CH3)2), 82.0 (C-3E), 80.9 (C-2E), 79.9 (C-4C), 77.7 (C-4D), 76.2 (C-3D), 75.8, 75.0, 74.4 (3C, CH2Ph), 73.7 (2C, C-4E, CH2Ph), 71.2 (2C, C-2C, 3C), 71.1 (C-5E), 69.2 (CH2O), 68.0 (2C, C-5C, 6E), 67.6 (C-5D), 62.7 (C-6D), 59.9 (C-2D), 51.0 (CH2N3), 28.9 ((*C*H3)2C), 23.4 (*C*H3CO), 19.2 ((*C*H3)2C), 18.1 (C-6C). FAB-MS for C67H74N4O17 (M, 1206) *m/z* 1229 [M+Na]+. Anal. Calcd. for C67H74N4O17: C, 60.41; H, 5.66; N, 4.82%. Found: C, 60.36; H, 5.69; N, 4.78%.

**2-Azidoethyl (2,3,4,6-Tetra-*O*-benzyl--D-glucopyranosyl)-(14)--L-rhamnopyranosyl-(13)-2-acetamido-2-deoxy--D-glucopyranoside (17).** An ice cold solution of 95% aq TFA (1.5 mL) in CH2Cl2 (13.5 mL) was added to the trisaccharide **15** (730 mg, 0.60 mmol). The mixture was kept at 0 °C for 15 min, then diluted with toluene and concentrated. Toluene was co-evaporated from the residue. The residue was dissolved in MeOH (20 mL), and a 1M solution of sodium methoxide in MeOH (1.5 mL) was added. The mixture was left to stand at rt for 3 h. The mixture was neutralised with Amberlite IR-120 (H+) resin and filtered. The filtrate was concentrated. The mixture was purified by column chromatography (solvent A, 9:1) to give **17** (548 mg, 94%) as a colourless foam. []D +9.7 (*c* 0.48, MeOH); 1H NMR:  7.31-7.13 (m, 8H, Ph), 5.99 (d, 1H, *J*NH,2 = 7.8 Hz, NH), 4.97-4.79 (m, 7H, H-1C, 1D, 1E, CH2Ph), 4.74-4.35 (m, 4H, CH2Ph), 4.10-3.91 (m, 7H, H-2C, 3D, 3E, 5C, 5E, 6aD, CH2O), 3.80 (m, 2H, H-3C, 6bD), 3.73 (m, 1H, CH2O), 3.63-3.40 (m, 8H, H-2E, 4C, 4D, 4E, 5D, 6aE, 6bE, CH2N3), 3.27 (m, 2H, H-2D, CH2N3), 1.99 (s, 3H, CH3CO), 1.41 (d, 3H, *J*5,6 = 6.2 Hz, H-6C); 13C NMR:  170.7 (C=O), 138.4-127.6 (Ph), 101.2 (C-1C), 99.7 (C-1E), 99.0 (C-1D), 84.7 (C-4C), 84.3 (C-3D), 81.5 (C-3E), 79.6 (C-2E), 77.6 (C-4D*), 75.6 (CH2Ph), 75.3 (C-4E*), 74.9, 73.5, 73.4 (3C, CH2Ph), 71.2 (C-5E), 70.8 (C-5C), 70.8 (C-5D), 69.4 (C-3C), 68.6 (C-6E), 68.4 (CH2O), 67.6 (C-2C), 62.6 (C-6D), 56.4 (C-2D), 50.5 (CH2N3), 23.5 (*C*H3CO), 17.6 (C-6C). FAB-MS for C50H62N4O15 (M, 958) *m/z* 981 [M+Na]+. Anal. Calcd. for C50H62N4O15.H2O : C, 61.46; H, 6.60; N, 5.73%. Found: C, 61.41; H, 6.61; N, 5.97%.

**Allyl (2,3,4-tri-*O*-acetyl-α-L-rhamnopyranosyl)-(1→3)-[(2,3,4,6-tetra-*O*-benzyl-α-D-glucopyranosyl)-(1→4)]-2-*O*-benzoyl-α-L-rhamnopyranoside (21).** TMSOTf (100 µL) was added to a solution of donor **20**[61] (2.5 g, 5.78 mmol) and acceptor **19**[46] (4.0 g, 4.80 mmol) in Et2O (40 mL) at –50 °C. The mixture was stirred for 2.5 h, at which time the cooling bath had reached rt. Et3N was added and after 15 min, volatiles were evaporated. Column chromatography (solvent C, 4:1) of the crude product gave the fully protected **21** (4.74 g, 89%) as a white solid.[]D +1.1 (*c* 1.0);1H NMR:  8.00-6.90 (m, 25H, Ph), 5.92 (m, 1H, CH=), 5.53 (dd, 1H, *J*1,2 = 1.8 Hz, H-2B), 5.34 (m, 1H, CH2=), 5.29 (dd, 1H, *J*1,2 = 2.0, *J*2,3 = 3.4 Hz, H-2C), 5.24 (m, 2H, H-1E, CH2=), 5.18 (dd, 1H, *J*2,3 = 3.4, *J*3,4 = 10.0 Hz, H-3B), 5.10 (d, 1H, *J*1,2 = 1.6 Hz, H-1B), 5.00-4.40 (m, 10H, H-4B, 1C, OCH2), 4.25-4.17 (m, 2H, H-3C, OCH2), 4.10 (m, 1H, 5E), 4.06 (dd, 1H, *J*3,4 = 9.6 Hz, H-3E), 4.03 (m, 1H, OCH2), 3.88 (dq, 1H, H-5C), 3.79 (pt, 1H, *J*4,5 = 9.0 Hz, H-4C), 3.71 (m, 3H, H-6aE, 6bE, 5B), 3.63 (dd, 1H, *J*1,2 = 3.4, *J*2,3 = 9.8 Hz, H-2E), 3.55 (dd, 1H, *J*4,5 = 9.3 Hz, H-4E), 1.90 (s, 3H, CH3CO), 1.60 (s, 3H, CH3CO), 1.22 (s, 3H, CH3CO), 1.20 (d, 3H, *J*5,6 = 6.2 Hz, H-6C), 0.80 (d, 3H, *J*5,6 = 6.2 Hz, H-6B); 13C NMR:  169.9, 169.7, 169.5, 166.1 (C=O), 133.4-127.3 (Ph), 117.5 (=CH2), 99.8 (C-1B), 96.9 (br s, C-1E), 95.7 (C-1C), 81.4 (C-3E), 80.7 (C-2E), 79.3 (C-3C), 77.7 (C-4E), 77.5 (br s, C-4C), 75.3, 74.6, 73.6 (3C, CH2Ph), 72.8 (C-2C), 72.6 (CH2Ph), 70.9 (2C, C-5E, 4B), 69.6 (C-2B), 68.7 (C-6E), 68.6 (C-3B), 68.2 (OCH2), 67.2 (C-5C), 66.8 (C-5B), 20.7, 20.3, 20.2 (3C, CH3CO), 18.5 (C-6C), 16.8 (C-6B). CI-MS for C62H70O18 (M, 1102) *m/z* 1125 [M+Na]+. Anal. Calcd. for C62H70O18: C, 67.50; H, 6.40%. Found: C, 67.51; H, 6.52%.

**(2,3,4-Tri-*O*-acetyl-α-L-rhamnopyranosyl)-(1→3)-[(2,3,4,6-tetra-*O*-benzyl-α-D-glucopyranosyl)-(1→4)]-2-*O*-benzoyl-/-L-rhamnopyranose (22).** 1,5-Cyclooctadiene-bis(methyldiphenylphosphine)iridium hexafluorophosphate (50 mg) was dissolved in THF (15 mL) and the resulting red solution was degassed in an argon stream. Hydrogen was then bubbled through the solution, until the colour had changed to yellow. The solution was then degassed again in an argon stream. A solution of **21** (4.6 g, 4.17 mmol) in THF (40 mL) was degassed and added. The mixture was stirred at rt overnight, then concentrated. The residue was taken up in a mixture of acetone:water (9:1, 50 mL). Mercuric chloride (1.5 g, 5.52 mmol) and mercuric oxide (1.3 g, 6.0 mmol) were added to the mixture, which was protected from light. The suspension was stirred at rt for 2 h, then concentrated. The residue was taken up in CH2Cl2 and washed three times with sat aq KI, then with brine. The organic phase was dried and concentrated. The residue was purified by column chromatography (solvent B, 3:1) to give **22** (3.8 g, 86%) as a colourless foam; 1H  NMR ( anomer):  8.13-7.10 (m, 25H, Ph), 5.50 (dd, 1H, H-2B), 5.30-5.27 (m, 2H, H-1C, 2C), 5.23 (d, 1H, *J*1,2 = 3.3 Hz, H-1E), 5.18 (dd, 1H, *J*2,3 = 3.2, *J*3,4 = 10.0 Hz, H-3B), 5.10 (d, 1H, *J*1,2 = 1.2 Hz, H-1B), 5.00-4.35 (m, 9H, H-4B, CH2Ph), 4.28 (dd, 1H, *J*2,3 = 3.2, *J*3,4 = 8.6 Hz, H-3C), 4.20-4.00 (m, 3H, H-3E, 5E, 5C), 3.80-3.50 (m, 6H, H-2E, 6aE, 6bE, 5B, 4E, 4C), 3.05 (d, 1H, *J*OH,1 = 4.0 Hz, OH), 2.09, 1.81, 1.44 (3s, 9H, CH3CO), 1.37 (d, 3H, *J*5,6 = 6.2 Hz, H-6C), 0.95 (d, 3H, *J*5,6 = 6.2 Hz, H-6B); 13C NMR ( anomer):  169.9, 169.8, 169.6, 166.2 (C=O), 138.9-127.5 (Ph), 99.8 (C-1B), 97.3 (C-1E), 91.3 (C-1C), 81.7 (C-3E), 80.7 (C-2E), 78.8 (C-3C), 78.1, 78.0 (2C, C-4E, 4C), 76.6, 75.5 (2C, CH2Ph), 74.9 (2C, C-2E, CH2Ph), 73.8 (CH2Ph), 73.3 (2C, C-4B, 5E), 72.9 (C-2B), 71.2 (2C, C-3B, 6E), 67.5 (C-5C), 67.1 (C-5B), 21.0, 20.6, 20.5 (3C, CH3CO), 18.9 (C-6C), 17.1 (C-6B). FAB-MS for C59H66O18 (M, 1062) *m/z* 1085 [M+Na]+. Anal. Calcd. for C59H66O18.H2O: C, 65.54; H, 6.34%. Found: C, 65.68; H, 6.41%.

**(2,3,4-Tri-*O*-acetyl-α-L-rhamnopyranosyl)-(1→3)-[(2,3,4,6-tetra-*O*-benzyl-α-D-glucopyranosyl)-(1→4)]-2-*O*-benzoyl-/-L-rhamnopyranosyl Trichloroacetimidate (5).** DBU (100 µL) was added at 0 °C to a solution of the hemiacetal **22** (3.8 g, 3.58 mmol) in CH2Cl2 (40 mL) containing trichloroacetonitrile (4 mL). The mixture was stirred for 30 min at 0 °C, and volatiles were evaporated. Flash chromatography (solvent B, 7:3 + 0.2% Et3N) of the crude material gave the donor **5** (3.9 g, 90%) as a white solid; 1H  NMR ( anomer):  8.75 (s, 1H, NH), 8.13-7.12 (m, 25H, Ph), 6.40 (d, 1H, *J*1,2 = 2.4 Hz, H-1C), 5.54 (br s, 1H, H-2B), 5.49 (dd, 1H, *J*2,3 = 2.9 Hz, H-2C), 5.26 (d, 1H, *J*1,2 = 2.8 Hz, H-1E), 5,20 (dd, 1H, *J*2,3 = *J*3,4 = 10.0 Hz, H-3B), 5.17 (br s, 1H, H-1B), 4.96 (dd, 1H, H-4B), 4.99-4.41 (m, 8H, OCH2), 4.34 (m, 1H, H-3C), 4.14-4.02 (m, 3H, H-3E, 5E, 5C), 3.87 (m, 1H, H-4C), 3.78 (dq, 1H, *J*4,5 = 9.5, *J*5,6 = 6.1 Hz, H-5B), 3.70 (m, 2H, H-6aE, 6bE), 3.65 (dd, 1H, *J*2,3 = 3.4, *J*3,4 = 9.8 Hz, H-2E), 3.57 (pt, 1H, *J*2,3 = *J*3,4 = 9.4 Hz, H-4E), 1.86, 1.83 (2s, 9H, CH3CO), 1.42 (d, 3H, *J*5,6 = 6.2 Hz, H-6C), 0.98 (d, 3H, H-6B); 13C NMR ( anomer): 170.3, 170.1, 169.9, 166.1 (4C, C=O), 160.7 (C=NH), 139.2-127.8 (Ph), 100.2 (C-1B), 98.1 (C-1E), 94.8 (C-1C), 91.2 (CCl3), 82.4 (C-4C), 82.0 (C-3E), 81.2 (br s, C-2E), 78.5 (br s, C-3C), 78.3 (C-4E), 75.9, 75.4, 74.3, 73.3 (4C, CH2Ph), 71.8 (C-5E), 71.7 (C-2C), 71.3 (C-4B), 70.8 (br s, C-5C), 70.0 (C-2B), 69.3 (C-3B), 69.2 (C-6E), 67.6 (C-5B), 21.3, 21.0, 20.9 (3C, CH3CO), 18.9 (C-6C), 17.1 (C-6B). Anal. Calcd. for C61H66Cl3NO18: C, 60.67; H, 5.51; N, 1.16%. Found: C, 60.53; H, 5.48; N, 1.38%.

**2-Azidoethyl (2,3,4-Tri-*O*-acetyl--L-rhamnopyranosyl)-(13)-[(2,3,4,6-tetra-*O*-benzyl--D-glucopyranosyl)-(14)]-(2-*O*-benzoyl--L-rhamnopyranosyl)-(13)-2-acetamido-2-deoxy-4,6-*O*-isopropylidene--D-glucopyranoside (23).** The trisaccharide donor **5** (1.86 g, 1.54 mmol) and the acceptor **7** (712 mg, 2.16 mmol) were dissolved in 1,2-DCE (15 mL) and 4Å-MS (2 g) were added. The mixture was stirred at rt for 1 h. The mixture was cooled to 0 °C and triflic acid (34 L, 0.385 mmol) was added. The mixture was stirred at 0 °C for 30 min, then at rt for 30 min. The mixture was then heated at 65 °C for 1 h. The mixture was allowed to cool, Et3N (0.5 mL) was added, and the mixture was stirred at rt for 20 min. The mixture was diluted with CH2Cl2 and filtered through a pad of Celite. The filtrate was concentrated and purified by column chromatography (solvent B, 1:1) to give **23** (1.61 g, 76%). []D +4.6 (*c* 1.0); 1H NMR:  7.90-6.90 (m, 25H, Ph), 5.92 (d, 1H, *J*2,NH = 7.5 Hz, NH), 5.53 (dd, 1H, *J*1,2 = 1.8 Hz, H-2B), 5.29 (d, 1H, *J*1,2 = 1.8 Hz, H-1E), 5.21 (m, overlapped, 1H, H-2C), 5.19 (m, partially overlapped, 1H, *J*2,3 = 3.2 Hz, H-3B), 5.09 (m, 2H, H-1C, 1D), 4.97 (br s, 1H, H-1B), 4.93 (m, overlapped, 1H, H-4B), 4.96-4.71 (m, 5H, CH2Ph), 4.54-4.41 (m, 3H, CH2Ph), 4.34 (pt, 1H, *J*3,4 = *J*4,5 = 9.4 Hz, H-3D), 4.19-3.98 (m, 5H, H-3C, 5C, 5E, 3E, OCH2), 3.92 (m, 1H, *J*5,6a = 5.2, *J*6a,6b = 10.7 Hz, H-6aD), 3.79-3.60 (m, 7H, H-6bD, 6aE, 6bE, 4C, 5B, 2E, OCH2), 3.56-3.33 (m, 4H, H-5D, 4E, 4D, CH2N3), 3.24 (m, 1H, CH2N3), 3.16 (m, 1H, H-2D), 2.10, 2.09, 1.78, 1.73 (4s, 12H, CH3CO), 1.35, 1.32 (2s, 6H, C(CH3)2), 1.31 (d, 3H, *J*5,6 = 6.2 Hz, H-6C), 0.90 (d, 3H, *J*5,6 = 6.2 Hz, H-6B); 13C NMR:  171.6, 169.8, 169.7, 169.6, 166.1 (C=O), 138.7-127.2 (Ph), 99.9 (br s, C-1B), 99.8 (C-1D), 99.5 (*C*(CH3)2), 97.1 (C-1C), 96.5 (br s, C-1E), 81.5 (C-3E), 81.1 (C-2E), 79.5 (br s, C-3C), 77.9 (C-4E), 77.0 (br s, C-4C), 75.4 (C-3D), 75.3, 74.7, 73.6 (3C, CH2Ph), 73.0, 72.9 (2C, C-2C, 4D), 72.9 (CH2Ph), 71.2 (C-5E), 71.1 (C-4B), 69.9 (C-2B), 69.2 (C-6E), 68.8 (C-3B), 68.7 (OCH2), 67.2, 67.1 (3C, C-5C, 5B, 5D), 62.2 (C-6D), 59.0 (C-2D), 50.6 (CH2N3), 29.0 (C(*C*H3)2), 23.5, 20.9, 20.5, 20.4 (4C, *C*H3CO), 19.1 (C(*C*H3)2), 18.4 (C-6C), 17.0 (C-6B). FAB-MS for C72H86N4O23 (M, 1374) *m/z* 1397 [M+Na]+. Anal. Calcd. for C72H86N4O23: C, 62.87; H, 6.30; N, 4.07%. Found: C, 63.51; H, 6.66; N, 3.77%.

**2-Azidoethyl (2,3,4-Tri-*O*-acetyl--L-rhamnopyranosyl)-(13)-[(2,3,4,6-tetra-*O*-benzyl--D-glucopyranosyl)-(14)]-(2-*O*-benzoyl--L-rhamnopyranosyl)-(13)-2-acetamido-2-deoxy--D-glucopyranoside (24).** 50% aq TFA (1.3 mL) was added to a solution of the fully protected tetrasaccharide **23** (210 mg, 111 µmol) in CH2Cl2 (6 mL). The mixture was stirred at 0 °C for 1 h. Volatiles were evaporated and toluene was co-evaporated from the residue. Column chromatography (solvent B, 7:3 **** 1:1) of the crude product gave **24** (195 mg, 95%). []D –6.9 (*c* 0.5, MeOH); 1H NMR:  8.08-7.14 (m, 25H, Ph), 5.78 (d, 1H, *J*2,NH = 7.4 Hz, NH), 5.51 (br s, 1H, H-2B), 5.27 (d, 1H, *J*1,2 = *J*2,3 = 2.9 Hz, H-2C), 5.18 (m, 2H, H-1E, 3B), 5.12 (br s, 1H, H-1B), 5.08 (d, 1H, *J*1,2 = 8.3 Hz, H-1D), 5.00 (d, 1H, *J*1,2 = 2.4 Hz, H-1C), 4.97 (d, 1H, *J* = 11.0 Hz, CH2Ph), 4.94 (pt, 1H, *J*3,4 = *J*4,5 = 9.9 Hz, H-4B), 4.87-4.24 (m, 7H, CH2Ph), 4.21 (dd, 1H, *J*2,3 = 8.0, *J*3,4 = 10.2 Hz, H-3D), 4.19 (dd, 1H, *J*2,3 = 3.2, *J*3,4 = 7.9 Hz, H-3C), 4.10-4.04 (m, 2H, H-5C, 5E), 4.03 (pt, 1H, *J*2,3 = *J*3,4 = 9.4 Hz, H-3E), 3.96 (dd, 1H, *J*5,6a = 3.5, *J*6a,6b = 12.5 Hz, H-6aD), 3.85 (dd, 1H, *J*5,6b = 4.0 Hz, H-6bD), 3.77-3.70 (m, 5H, H-4C, 6aE, 6bE, OCH2), 3.68 (m, 1H, *J*4,5 = 9.8 Hz, H-5B), 3.63 (dd, 1H, *J*1,2 = 3.4, *J*2,3 = 9.8 Hz, H-2E), 3.60 (dd, 1H, *J*4,5 = 9.6 Hz, H-4E), 3.55-3.44 (m, 3H, H-4D, 5D, CH2N3), 3.29 (m, 1H, CH2N3), 3.14 (m, 1H, H-2D), 2.13, 2.01, 1.82, 1.80 (4s, 12H, CH3CO), 1.39 (d, 3H, *J*5,6 = 6.2 Hz, H-6C), 0.93 (d, 3H, *J*5,6 = 6.1 Hz, H-6B); 13C NMR:  171.5, 170.2, 170.1, 170.0, 166.3 (C=O), 139.2-127.9 (Ph), 99.8 (2C, C-1B, 1D), 99.5 (C-1C), 98.0 (br s, C-1E), 84.3 (C-3D), 82.0 (C-3E), 81.1 (C-2E), 78.8 (br s, C-3C), 78.2 (2C, C-4C, 4E), 75.9 (CH2Ph), 75.6 (C-4D), 75.2, 74.2, 73.4 (3C, CH2Ph), 73.0 (C-2C), 71.7 (C-5E), 71.4 (C-5D), 71.3 (C-4B), 70.1 (C-2B), 69.4 (C-6E), 69.2, 69.1 (C-3B, 5C), 68.9 (OCH2), 67.5 (C-5B), 63.2 (C-6D), 57.7 (C-2D), 51.1 (CH2N3), 23.8, 21.3, 21.0, 20.9 (4C, *C*H3CO), 19.1 (C-6C), 17.4 (C-6B). FAB-MS for C69H82N4O23 (M, 1334) *m/z* 1357.5. Anal. Calcd. for C69H82N4O23.H2O: C, 60.43; H, 6.32; N, 4.09%. Found: C, 60.56; 6.22, 3.92%.

**(S-Acetylthiomethyl)carbamoylethyl -D-Glucopyranosyl-(14)--L-rhamnopyranosyl-(13)-2-acetamido-2-deoxy--D-glucopyranoside (38).** The trisaccharide **18** (58 mg, 0.1 mmol) was dissolved in DMF (1 mL). SAMA-Pfp (33 mg, 0.11 mmol) was added, and the mixture was left to stand at rt for 40 min. Toluene was added, and the mixture was concentrated. Ether was added to the residue. The resulting precipitate was collected and purified by passing through a column of C18 silica (solvent D, gradient) to give **38** (36 mg, 53%). HPLC (230 nm): Rt 13.74 min (99% pure, Kromasil 5 µm C18 100 Å 4.6x250 mm analytical column, using a 0-20% linear gradient over 20 min of CH3CN in 0.01M aq TFA at 1 mL/min flow rate). 1H NMR (D2O):  4.96 (d, 1H, *J*1,2 = 3.9 Hz, H-1E), 4.76 (d, 1H, *J*1,2 = 1.4 Hz, H-1C), 4.49 (d, 1H, *J*1,2 = 8.6 Hz, H-1D), 4.01 (dq, 1H, *J*4,5 = 9.6 Hz, H-5C), 3.92 (m, 1H, H-5E), 3.86 (dd, 1H, *J*5,6a = 2.0, *J*6a,6b = 12.4 Hz, H-6aD), 3.81 (dd, 1H, *J*5,6b = 5.3 Hz, H-6bD), 3.75 (m, 1H, H-3C), 3.74-3.66 (m, 5H, H-2D, 2C, 6aE, 6bE, CH2O), 3.65 (m, 1H, H-3E), 3.59 (s, 2H, CH2S), 3.52 (m, 1H, H-3D), 3.48 (dd, 1H, *J*2,3 = 10.0 Hz, H-2E), 3.45-3.39 (m, 3H, H-4D, 4C, 5D), 3.37 (m, 1H, H-4E), 3.32 (m, 2H, CH2NH), 2.34 (s, 3H, CH3C(O)S), 1.99 (s, 3H, CH3C(O)N), 1.24 (d, 3H, *J*5,6 = 6.3 Hz, H-6C), 1.23 (d, 3H, *J*5,6 = 6.2 Hz, H-6B); 13C NMR (D2O):  200.3 (SC=O), 175.2, 171.9 (NC=O), 102.1 (C-1C), 101.2 (C-1D), 100.5 (C-1E), 82.7 (C-3D), 81.8 (C-4C), 76.8 (C-2E), 73.6 (C-3E), 72.6 (C-5E), 72.4 (C-4D), 71.8 (C-2C), 70.2 (C-4E), 69.7 (C-3C), 69.4 (C-5D), 68.9 (C-5C), 68.9 (CH2O), 61.6 (C-6D), 60.9 (C-6E), 56.1 (C-2D), 40.6 (CH2NH), 33.7 (CH2S), 30.4 (*C*H3C(O)S), 23.0 (*C*H3C(O)N), 17.5 (C-6C). ES-MS for C26H44N2O17S (M 688) *m/z* 689 [M+H]+. HRMS (MALDI) Calcd for C22H44N2O17SNa: 711.2258. Found: 711.2294.

**(S-Acetylthiomethyl)carbamoylethyl -L-Rhamnopyranosyl-(13)-[-D-glucopyranosyl-(14)]--L-rhamnopyranosyl-(13)-2-acetamido-2-deoxy--D-glucopyranoside (39).** A solution of SAMA-Pfp (16.7 mg, 40 µmol) in CH3CN (150 µL) was added to the tetrasaccharide **25** (20 mg, 28.8 µmol) in 0.1M phosphate buffer (pH 7.4, 600 µL). The mixture was stirred at rt for 45 min and purified by RP-HPLC to give **39** (17 mg, 74%). HPLC (230 nm): Rt 13.63 min (98% pure, Kromasil 5 µm C18 100 Å 4.6x250 mm analytical column, using a 0-20% linear gradient over 20 min of CH3CN in 0.01M aq TFA at 1 mL/min flow rate). 1H NMR (D2O):  5.10 (d, 1H, *J*1,2 = 3.7 Hz, H-1E), 4.91 (br s, 1H, H-1B), 4.73 (br s, 1H, H-1C), 4.45 (d, 1H, *J*1,2 = 8.5 Hz, H-1D), 4.09 (dq, 1H, *J*4,5 = 9.4 Hz, H-5C), 3.97 (dd, 1H, *J*1,2 = 1.4, *J*2,3 = 3.2 Hz, H-2B), 3.87 (m, 4H, H-2C, 3C, 6aD, CH2O), 3.78-3.62 (m, 9H, H-2D, 3B, 4C, 5B, 6bD, 5E, 6aE, 6bE, CH2O), 3.60 (m, 3H, H-3E, CH2S), 3.52 (dd, 1H, *J*2,3 = 8.4, *J*3,4 = 10.0 Hz, H-3D), 3.49-3.39 (m, 5H, H-2E, 4B, 4D, 4E, 5D), 3.33 (m, 2H, CH2NH), 2.35 (s, 3H, CH3C(O)S), 1.98 (s, 3H, CH3C(O)N), 1.27 (d, 3H, *J*5,6 = 6.3 Hz, H-6C), 1.23 (d, 3H, *J*5,6 = 6.2 Hz, H-6B); 13C NMR (D2O):  199.8 (SC=O), 174.5, 171.3 (NC=O), 103.2 (C-1B), 101.4 (C-1C), 100.9 (C-1D), 98.6 (C-1E), 82.0 (C-3D), 79.0 (C-3C), 76.6 (br s, C-4C), 76.3 (C-2E*), 72.9 (C-3E), 72.3, 72.2 (C-5E, 4B), 71.8 (C-4D*), 71.0 (br s, C-2C), 70.5 (2C, C-2B, 3B), 69.7 (C-5B), 69.5 (C-4E), 69.1, 68.8 (2C, C-5C, 5D), 68.4 (CH2O), 61.1, 60.7 (2C, C-6D, 6E), 55.5 (C-2D), 40.1 (CH2NH), 33.2 (CH2S), 29.9 (*C*H3C(O)S), 22.6 (*C*H3C(O)N), 17.9 (C-6C), 16.9 (C-6B). ES-MS for C32H54N2O21S (M, 834) *m/z* 857 [M+Na]+. HRMS-MALDI Calcd for C32H54N2O21SNa: 857.2838. Found: 857.2576.

**(S-Acetylthiomethyl)carbamoylethyl -L-Rhamnopyranosyl-(12)--L-rhamnopyranosyl-(13)-[-D-glucopyranosyl)-(14)]--L-rhamnopyranosyl-(13)-2-acetamido-2-deoxy--D-glucopyranoside (40).** The pentasaccharide **37** (6.4 mg, 7.4 µmol) was dissolved in 0.1M phosphate buffer (pH 7.4, 1.0 mL). SAMA-Pfp (6.6 mg, 22 µmol) was added, and the mixture was stirred at rt for 5 h. More SAMA-Pfp (6.6 mg, 22 µmol) was added and the mixture was stirred for 1 h more at rt. RP-HPLC of the mixture gave **40** (5.4 mg, 75%). HPLC (230 nm): Rt 13.86 min (100% pure, Kromasil 5 µm C18 100 Å 4.6x250 mm analytical column, using a 0-20% linear gradient over 20 min of CH3CN in 0.01M aq TFA at 1 mL/min flow rate). 1H NMR (D2O):  5.14 (d, 1H, *J*1,2 = 3.8 Hz, H-1E), 4.99 (br s, 1H, H-1B), 4.91 (ds, 1H, *J*1,2 = 1.4 Hz, H-1A), 4.75 (br s, 1H, H-1C), 4.48 (d, 1H, *J*1,2 = 8.6 Hz, H-1D), 4.09 (dq, 1H, *J*4,5 = 9.2 Hz, H-5C), 4.00 (m, 2H, H-2A, 2B), 3.85-3.64 (m, 17H, H-2C, 2D, 3A, 5E, 4B, 6aD, 6bD, 3B, 3C, 3E, 4C, 5A, 5B, 6aE, 6bE, CH2O), 3.60 (m, 2H, CH2S), 3.56-3.28 (m, 10H, H-2E, 3D, 4A, 4B, 4D, 4E, 5D, 5E,CH2NH), 2.35 (s, 3H, CH3COS), 1.99 (s, 3H, CH3CON), 1.28 (d, 3H, *J*5,6 = 6.3 Hz, H-6C), 1.20 (m, 6H, H-6A, 6B); 13C NMR (D2O):  199.9 (SC=O), 174.5, 171.4 (NC=O), 102.8 (C-1A), 101.7 (C-1B), 101.4 (C-1C), 100.9 (C-1D), 97.9 (br s, C-1E), 82.0 (C-3D), 79.7 (C-2B), 79.4 (br s, C-3C), 76.3 (C-2C), 72.9 (C-3E), 72.4, 72.2, 71.8, 71.0, 70.4 (2C), 70.2, 70.0 69.0, 69.5, 69.1, 68.8, 68.5 (CH2O), 61.2, 61.0 (2C, C-6D, 6E), 55.6 (C-2D), 40.1 (CH2NH), 33.2 (CH2S), 29.9 (*C*H3C(O)S), 22.7 (*C*H3C(O)N), 18.2 (C-6C), 17.2, 17.0 (2C, C-6A, 6B). HRMS (MALDI)Calcd forC38H64N2O25S+Na: 1003.3417. Found: 1003.3426.
